# Supplementary material for: Systematic Evaluation of Antigenic Stimulation in Chronic Lymphocytic Leukemia: Humoral Immunity as Biomarkers for Disease Evolution
Source: MDPI journal article supplement (doi:10.3390/cancers15030891), 2023-01-31
Supplement: s1 [file s1]

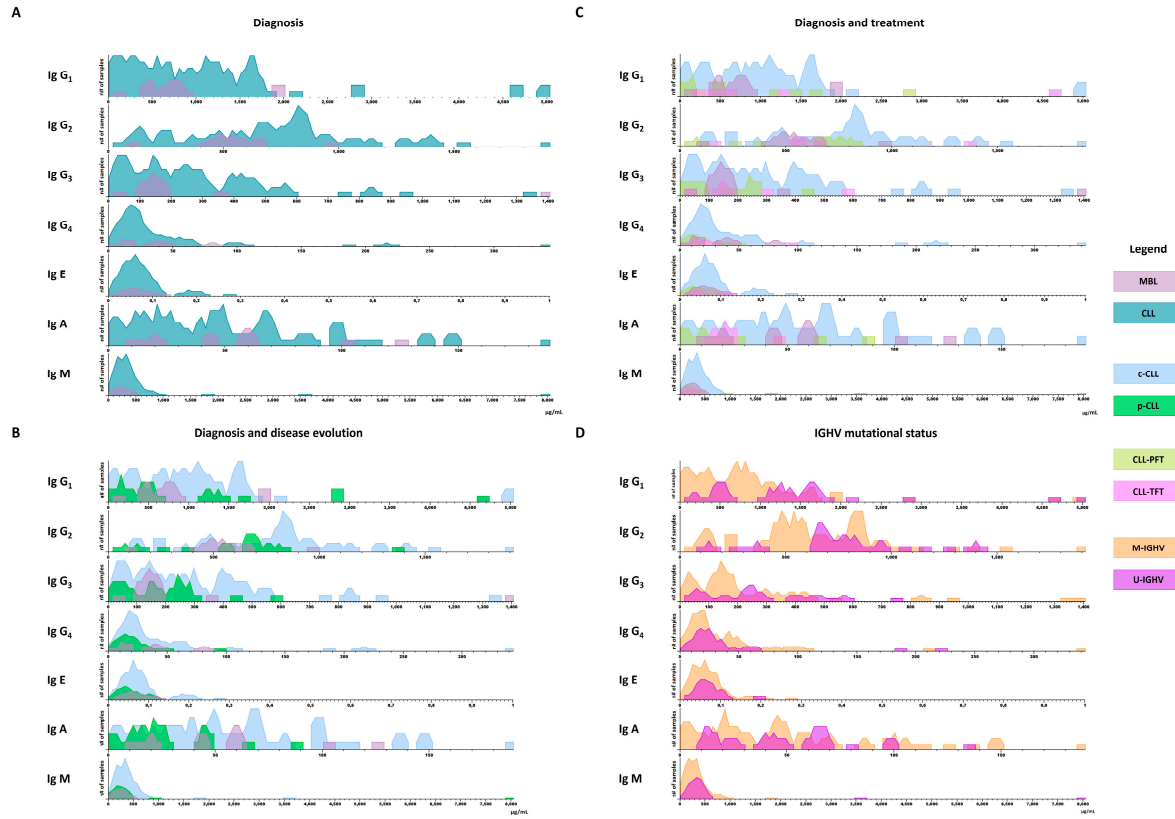

**Figure S1.** Distributions of the immunoglobulins' quantitative levels according to clinical/diagnosis subsets: **(A)** MBL and CLL groups; **(B)** MBL, c-CLL, and p-CLL groups; **(C)** MBL, c-CLL, and treatment (CLL-PFT and CLL-TFT) groups; **(D)** IGHV mutational status (M-IGHV or U-IGHV) groups.

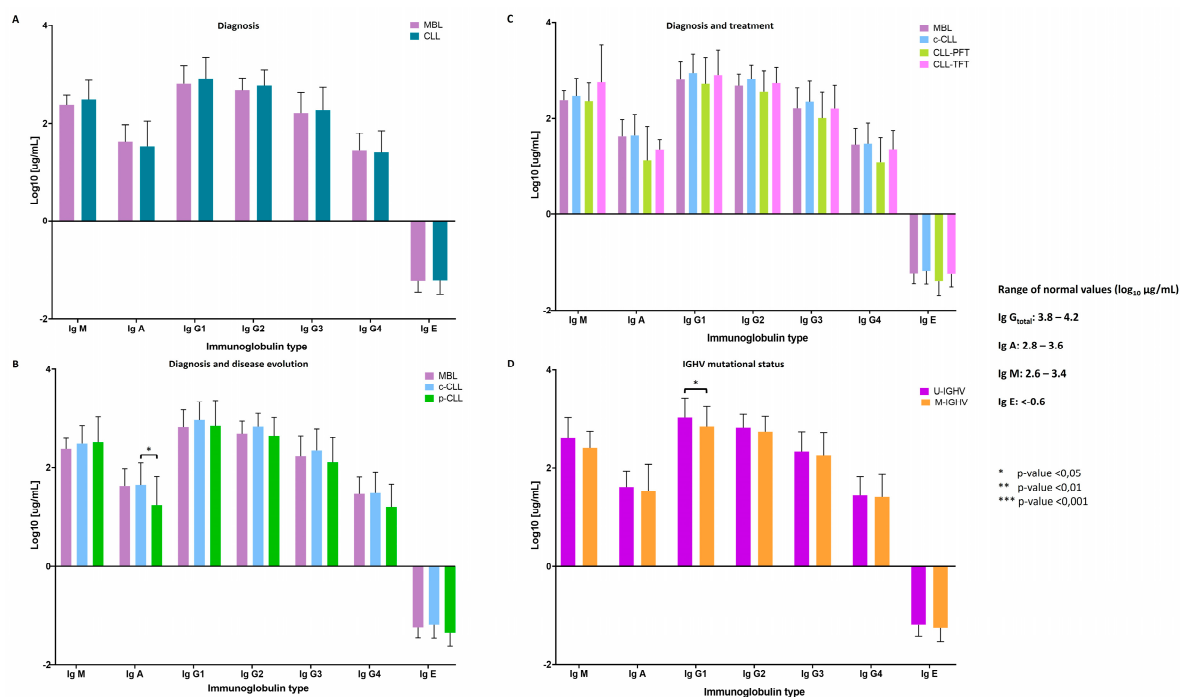

**Figure S2.** Quantitative distribution profiles for each immunoglobulin according to patient subsets: (A) diagnosis groups; (B) diagnosis and disease evolution groups; (C) diagnosis and treatment groups; (D) IGHV mutational status groups.



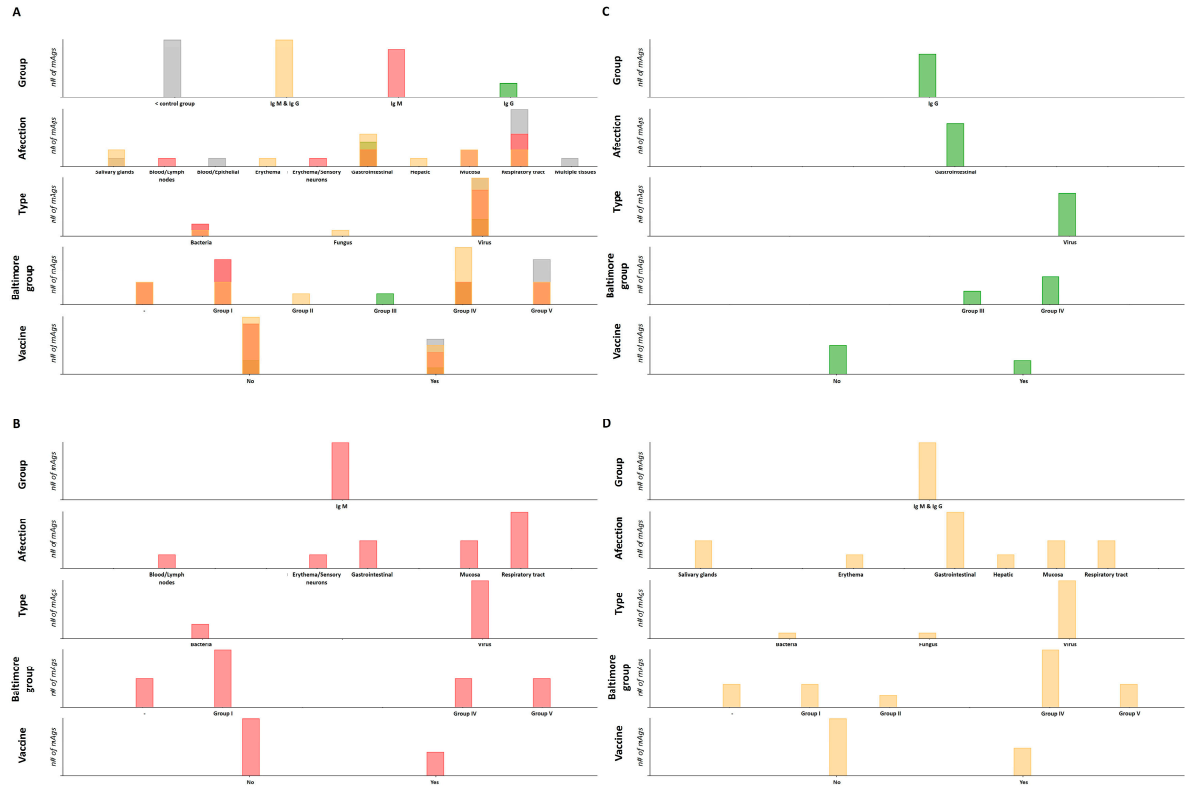

**Figure S4.** Summary of antimicrobial antibodies (Ig G and Ig M) detected at 0.0001  $\mu\text{g}/\mu\text{L}$  [antigen]: (A) distribution according to immunoglobulin isotype detected in the studied cohort; (B) distribution of antimicrobial Ig M; (C) distribution of antimicrobial Ig G; (D) distribution of antimicrobial Ig M and Ig G).

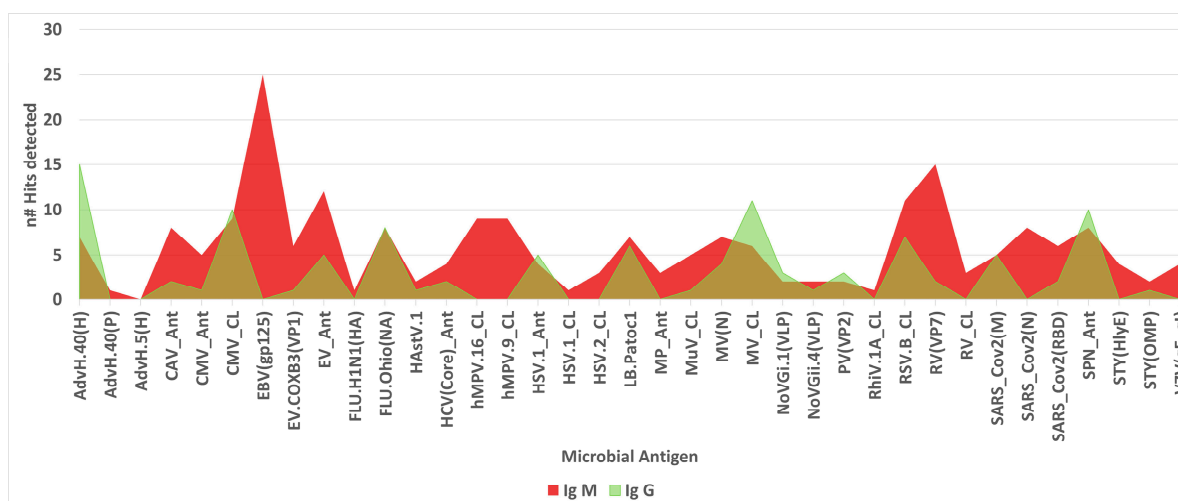

**Figure S5.** Quantitative summary of microbial antigens detected in this study.
